# Supplementary material
Source: publisher site journal article supplement (https://www.dovepress.com/article/535357)
Supplement: Supplementary file 1 [file 535357%20Revised%20Supplementary%20Material.pdf]

Supplementary Table 1 Reverse causal association between PPD and gut microbiota.

| Exposure | Outcome                                            | Methods         | SNPs | Beta   | SE    | OR (95%CI)      | P-value | Heterogeneity |       | Horizontal pleiotropy |       |
|----------|----------------------------------------------------|-----------------|------|--------|-------|-----------------|---------|---------------|-------|-----------------------|-------|
|          |                                                    |                 |      |        |       |                 |         | Cochran's Q   | P     | Egger intercept       | P     |
| PPD      | Family<br><i>Veillonellaceae</i>                   | IVW             | 14   | -0.006 | 0.035 | 0.99(0.93-1.06) | 0.853   | 10.107        | 0.685 | 0.013                 | 0.564 |
|          |                                                    | MR Egger        | 14   | -0.138 | 0.225 | 0.87(0.56-1.35) | 0.550   | 9.756         | 0.637 |                       |       |
|          |                                                    | Weighted median | 14   | 0.005  | 0.047 | 1.01(0.92-1.10) | 0.914   | -             | -     |                       |       |
|          |                                                    | Weighted mode   | 14   | 0.014  | 0.083 | 1.01(0.86-1.19) | 0.867   | -             | -     |                       |       |
| PPD      | Class<br><i>Alphaproteobacteria</i>                | IVW             | 14   | 0.049  | 0.047 | 1.05(0.96-1.15) | 0.299   | 14.138        | 0.364 | 0.012                 | 0.697 |
|          |                                                    | MR Egger        | 14   | 0.172  | 0.313 | 1.19(0.64-2.20) | 0.592   | 13.954        | 0.304 |                       |       |
|          |                                                    | Weighted median | 14   | 0.054  | 0.061 | 1.06(0.94-1.19) | 0.381   | -             | -     |                       |       |
|          |                                                    | Weighted mode   | 14   | 0.055  | 0.102 | 1.06(0.86-1.29) | 0.601   | -             | -     |                       |       |
| PPD      | Genus<br><i>Family XIII AD3011</i><br><i>group</i> | IVW             | 14   | 0.021  | 0.038 | 1.02(0.95-1.10) | 0.578   | 13.925        | 0.379 | 0.046                 | 0.071 |
|          |                                                    | MR Egger        | 14   | -0.444 | 0.238 | 0.64(0.40-1.02) | 0.087   | 10.013        | 0.615 |                       |       |
|          |                                                    | Weighted median | 14   | -0.019 | 0.051 | 0.98(0.89-1.08) | 0.706   | -             | -     |                       |       |
|          |                                                    | Weighted mode   | 14   | -0.036 | 0.086 | 0.96(0.81-1.14) | 0.683   | -             | -     |                       |       |

Supplementary Table 2 SNP genes of *Family XIII AD3011 group*.

| SNP        | chromosome_name | chromosome<br>_position | distance | is_mapped_gene | is_closest_gene | is_intergenic | is_upstream | is_downstream | source | mapping_method |
|------------|-----------------|-------------------------|----------|----------------|-----------------|---------------|-------------|---------------|--------|----------------|
| rs11126423 | ACTG2           | 2                       | 73968424 | 48559          | FALSE           | FALSE         | TRUE        | TRUE          | FALSE  | Ensembl        |
| rs11126423 | STAMBP          | 2                       | 73968424 | 94765          | FALSE           | FALSE         | TRUE        | TRUE          | FALSE  | Ensembl        |
| rs11126423 | DGUOK-AS1       | 2                       | 73968424 | 0              | TRUE            | FALSE         | FALSE       | FALSE         | FALSE  | Ensembl        |
| rs11126423 | RNA5SP97        | 2                       | 73968424 | 218            | FALSE           | TRUE          | TRUE        | TRUE          | FALSE  | Ensembl        |
| rs11126423 | DGUOK           | 2                       | 73968424 | 9463           | FALSE           | FALSE         | TRUE        | TRUE          | FALSE  | Ensembl        |
| rs11126423 | TET3            | 2                       | 73968424 | 16486          | FALSE           | TRUE          | TRUE        | FALSE         | TRUE   | Ensembl        |
| rs11126423 | LOC107985898    | 2                       | 73968424 | 17181          | FALSE           | FALSE         | TRUE        | FALSE         | TRUE   | NCBI           |
| rs11126423 | LOC100420774    | 2                       | 73968424 | 90605          | FALSE           | FALSE         | TRUE        | TRUE          | FALSE  | NCBI           |
| rs16940167 | AQP9            | 15                      | 58391498 | 205587         | FALSE           | TRUE          | TRUE        | TRUE          | FALSE  | Ensembl        |
| rs16940167 | LIPC            | 15                      | 58391498 | 19071          | FALSE           | TRUE          | TRUE        | FALSE         | TRUE   | Ensembl        |
| rs16940167 | ALDH1A2         | 15                      | 58391498 | 0              | TRUE            | FALSE         | FALSE       | FALSE         | FALSE  | Ensembl        |
| rs16940167 | LIPC-AS1        | 15                      | 58391498 | 43392          | FALSE           | FALSE         | TRUE        | FALSE         | TRUE   | Ensembl        |
| rs16940167 | RPL28P4         | 15                      | 58391498 | 190564         | FALSE           | TRUE          | TRUE        | TRUE          | FALSE  | NCBI           |

Supplementary Table 3 The relevance scores of the top 20 pathogenic genes.

| Gene Symbol | Relevance score |
|-------------|-----------------|
| BDNF        | 42              |
| FKBP5       | 38              |
| COMT        | 32              |
| NR3C1       | 30              |
| TNF         | 25              |
| MTHFR       | 21              |
| CRHR1       | 21              |
| OXTR        | 20              |
| LEP         | 20              |
| IL1B        | 19              |
| IL10        | 18              |
| CREB1       | 16              |
| NR3C2       | 14              |
| DISC1       | 13              |
| SOD1        | 12              |
| PER3        | 12              |
| GHRL        | 12              |
| CLOCK       | 12              |
| HP1BP3      | 11              |
| IDO1        | 11              |

**Supplementary Table 4** MR estimates for the association between the gut microbiota and PPD (threshold of  $p < 1 \times 10^{-8}$ )

| Gut microbiota (exposure) | Methods | SNPs | Beta   | SE    | OR (95%CI)      | P-value |
|---------------------------|---------|------|--------|-------|-----------------|---------|
| order                     | IVW     | 2    | -0.247 | 0.190 | 0.78(0.54-1.13) | 0.194   |
| Bifidobacteriales family  | IVW     | 2    | 0.25   | 0.190 | 0.78(0.54-1.13) | 0.194   |
| Bifidobacteriaceae genus  | IVW     | 2    | 0.242  | 0.186 | 1.24(0.56-1.13) | 0.192   |
| Bifidobacterium           |         |      |        |       |                 |         |

MR, mendelian randomization; IVW, inverse-variance weighted; SNP, single nucleotide polymorphisms; Beta, The effect size of the exposure on PPD; SE, standard errors; OR, odd ratio; CI, confidence interval; PPD, postpartum depression.

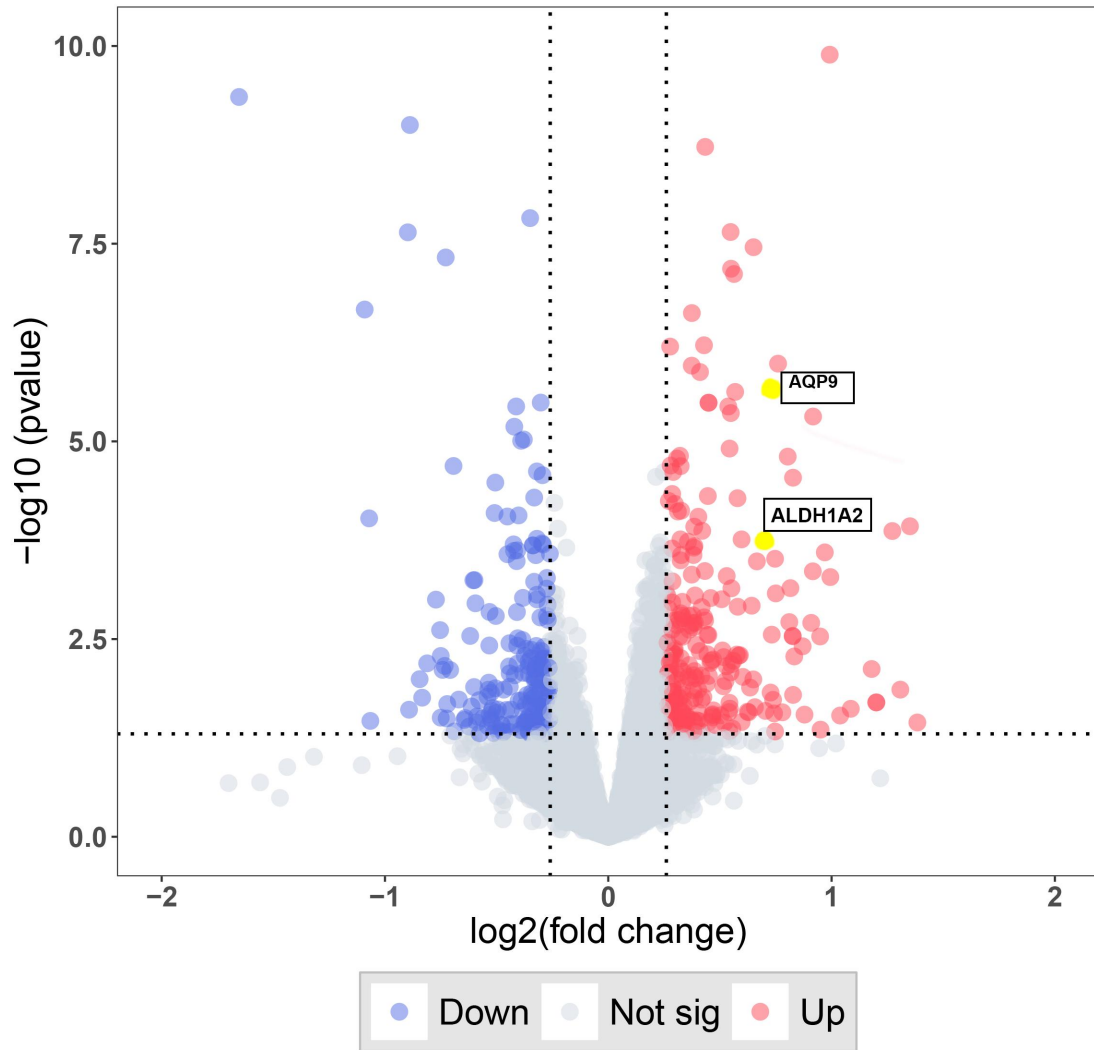

**Supplementary Figure 1.** Volcano plot showing differentially expressed genes (DEGs) in hypothalamus of mice in GSE70732. The up-regulated (red) or down-regulated (blue) genes between PPD vs. Control groups.
